# Supplementary material for: Deconstructing the role of MALAT1 in MAPK-signaling in melanoma: insights from antisense oligonucleotide treatment
Source: PubMed Central journal article supplement (PMC10219656; doi:10.18632/oncotarget.28447), 2023-05-26
Supplement: oncotarget-14-28447-s001.pdf [file oncotarget-14-28447-s001.pdf]

## Deconstructing the role of MALAT1 in MAPK-signaling in melanoma: insights from antisense oligonucleotide treatment

### SUPPLEMENTARY MATERIALS

**Supplementary Table 1: MALAT1 isoforms have low coding potential**

| MALAT1 Isoforms | length (bp) | Protein coding potential metrics |                |                |                |                         |                |                    |                |
|-----------------|-------------|----------------------------------|----------------|----------------|----------------|-------------------------|----------------|--------------------|----------------|
|                 |             | PRIDE reprocessing 2.0           |                | PhyloCSF score |                | CPAT coding probability |                | Bazzini small ORFs |                |
|                 |             | Raw result                       | Interpretation | Raw result     | Interpretation | Raw result              | Interpretation | Raw result         | Interpretation |
| ENST00000534336 | 8762        | 0                                | non-coding     | -38.4593       | non-coding     | 2.56%                   | non-coding     | 1                  | non-coding     |
| ENST00000619449 | 5340        | 0                                | non-coding     | -54.9455       | non-coding     | 1.84%                   | non-coding     | 0                  | non-coding     |
| ENST00000508832 | 1519        | 0                                | non-coding     | -28.0879       | non-coding     | 0.45%                   | non-coding     | 0                  | non-coding     |
| ENST00000618132 | 725         | 0                                | non-coding     | -40.8265       | non-coding     | 0.08%                   | non-coding     | 0                  | non-coding     |
| ENST00000618227 | 593         | 0                                | non-coding     | -74.1569       | non-coding     | 0.41%                   | non-coding     | 0                  | non-coding     |
| ENST00000616691 | 587         | 0                                | non-coding     | -84.4973       | non-coding     | 6.15%                   | non-coding     | 0                  | non-coding     |
| ENST00000610851 | 584         | 0                                | non-coding     | -74.1569       | non-coding     | 1.27%                   | non-coding     | 0                  | non-coding     |
| ENST00000616527 | 572         | 0                                | non-coding     | -108.3966      | non-coding     | 9.52%                   | non-coding     | 1                  | non-coding     |
| ENST00000544868 | 480         | 0                                | non-coding     | -606.7062      | non-coding     | 1.45%                   | non-coding     | 1                  | non-coding     |
| ENST00000618925 | 424         | 0                                | non-coding     | -52.3196       | non-coding     | 0.39%                   | non-coding     | 0                  | non-coding     |
| ENST00000617791 | 394         | 0                                | non-coding     | -366.659       | non-coding     | 5.77%                   | non-coding     | 0                  | non-coding     |
| ENST00000610481 | 353         | 0                                | non-coding     | -              | non-coding     | 3.62%                   | non-coding     | 0                  | non-coding     |
| ENST00000620902 | 352         | 0                                | non-coding     | -              | non-coding     | 0.93%                   | non-coding     | 0                  | non-coding     |
| ENST00000620465 | 333         | 0                                | non-coding     | -99.0741       | non-coding     | 0.55%                   | non-coding     | 0                  | non-coding     |
| ENST00000617489 | 318         | 0                                | non-coding     | -84.4973       | non-coding     | 6.23%                   | non-coding     | 0                  | non-coding     |
| ENST00000612781 | 234         | 0                                | non-coding     | -99.0741       | non-coding     | 0.03%                   | non-coding     | 0                  | non-coding     |
| ENST00000613376 | 132         | N/A                              | N/A            | N/A            | N/A            | N/A                     | N/A            | N/A                | N/A            |

Listed are the 17 MALAT1 isoforms and their length as annotated in the ensemble gene-annotation GRCH38.p13 (human) and the LNCIPEDIA-database (V 5.2). Conservation and coding probability scores for MALAT1-isoforms, calculated by the four different bioinformatic toolsets PRIDE reprocessing 2.0, PhyloCSF, CPAT and Bazzini small ORFs. Positional locus conservation is defined by the flanking protein coding genes and their orthology compared to the human lncRNA, assessed by the Ensembl Compara API.

**Supplementary Table 2: Comparison of the MALAT1-ASO sequence TAAAGCCTAGTTAACG to its top 15 hits in the human transcriptome shows high on-target affinity to three MALAT1 isoforms and low off-target binding affinity to other RNA-transcripts**

| Rank | Transcript name | species      | Accession Nr   | RNA type           | Total score | Query cover | E value | miss matches |
|------|-----------------|--------------|----------------|--------------------|-------------|-------------|---------|--------------|
| 1    | MALAT1-1        | Homo Sapiens | NR_002819.4    | non protein-coding | 32.2        | 100%        | 1.5     | 0            |
| 2    | MALAT1-2        | Homo Sapiens | NR_144567.1    | non protein-coding | 32.2        | 100%        | 1.5     | 0            |
| 3    | MALAT1-3        | Homo Sapiens | NR_144568.1    | non protein-coding | 32.2        | 100%        | 1.5     | 0            |
| 4    | MRGBP-ncRNA     | Homo Sapiens | NR_136405.2    | non protein-coding | 46.6        | 81%         | 90      | 3            |
| 5    | MRGBP-mRNA      | Homo Sapiens | NM_018270.6    | protein-coding     | 46.6        | 81%         | 90      | 3            |
| 6    | PIK3CB-2        | Homo Sapiens | NM_001256045.2 | protein-coding     | 24.3        | 75%         | 354     | 4            |
| 7    | HAUS2-2         | Homo Sapiens | NM_001130447.2 | protein-coding     | 24.3        | 75%         | 354     | 4            |
| 8    | ZNF283-2        | Homo Sapiens | NM_001297752.2 | protein-coding     | 24.3        | 75%         | 354     | 4            |
| 9    | HAUS2-5         | Homo Sapiens | NM_001323631.2 | protein-coding     | 24.3        | 75%         | 354     | 4            |
| 10   | HAUS2-4         | Homo Sapiens | NM_001323630.2 | protein-coding     | 24.3        | 75%         | 354     | 4            |
| 11   | HAUS2-6         | Homo Sapiens | NM_001323632.2 | protein-coding     | 24.3        | 75%         | 354     | 4            |
| 12   | CUL1-2          | Homo Sapiens | NM_001370660.1 | protein-coding     | 24.3        | 75%         | 354     | 4            |
| 13   | C11orf16        | Homo Sapiens | NM_020643.3    | protein-coding     | 24.3        | 75%         | 354     | 4            |
| 14   | HAUS2-1         | Homo Sapiens | NM_018097.3    | protein-coding     | 24.3        | 75%         | 354     | 4            |
| 15   | ZNF283-1        | Homo Sapiens | NM_181845.2    | protein-coding     | 24.3        | 75%         | 354     | 4            |

**Supplementary Table 3: List of all primers used for RT-qPCR**

| Target | Forward                | Reverse                 |
|--------|------------------------|-------------------------|
| MALAT1 | GACGGAGGTTGAGATGAAGC   | ATTCGGGGCTCTGTAGTCCT    |
| NRAS   | ATGACTGAGTACAACTGGTGGT | CATGTATTGGTCTCTCATGGCAC |
| BRAF   | CCCCAAGTCACCACAAAACC   | CGGACTGTAACCTCCACACCTT  |
| MEK1   | CAATGGCGGTGTGGTGTTC    | GATTGCGGGTTTGATCTCCAG   |
| MEK2   | CCAAGGTCGGCGAACTCAA    | TCTCAAGGTGGATCAGCTTCC   |
| ERK1   | CTACACGCAGTTGCAGTACAT  | CAGCAGGATCTGGATCTCCC    |
| ERK2   | TACACCAACCTCTCGTACATCG | CATGTCTGAAGCGCAGTAAGATT |
| GAPDH  | TGGAAGGACTCATGACCACA   | GCCATCACGCCACAGTTT      |
